Caesarean birth in public maternities in Argentina: a formative research study on the views of obstetricians, midwives, and trainees.

Perrotta Carla, Romero Mariana, Sguassero Yanina, Straw Cecilia, Gialdini Celina, Righetti Natalia, Betrán Ana- Pilar, Ramos Silvina

Carla Perrotta, PhD. Corresponding author. School of Public Health, University College Dublin, National University of Ireland, Dublin, Ireland. Address: Woodview House, Belfield campus. E-mail: [carla.perrotta@ucd.ie](mailto:carla.perrotta@ucd.ie) +353 83 84 99147

Mariana Romero, MD. Centro de Estudios de Estado y Sociedad (CEDES)- CONICET (Consejo Nacional de Investigaciones Científicas y Tecnológicas), Buenos Aires, Argentina. E-mail: [mromero@cedes.org](mailto:mromero@cedes.org)

Yanina Sguassero, PhD. Centro Rosarino de Estudios Perinatales, Rosario, Argentina. E-mail: [ysguassero@crep.org.ar](mailto:ysguassero@crep.org.ar)

Cecilia Straw, PhD. Facultad de Ciencias Sociales, Universidad de Buenos Aires. Centro de Estudios de Estado y Sociedad (CEDES)- CONICET (Consejo Nacional de Investigaciones Científicas y Tecnológicas), Buenos Aires, Argentina. E-mail: [Cecilia.straw@gmail.com](mailto:Cecilia.straw@gmail.com)

Celina Gialdini, MD. Centro Rosarino de Estudios Perinatales, Rosario, Argentina. E-mail: [cgialdini@crep.org.ar](mailto:cgialdini@crep.org.ar).

Natalia Righetti, MSc. Centro de Estudios de Estado y Sociedad (CEDES), Buenos Aires, Argentina. E-mail: [natirighetti@gmail.com](mailto:natirighetti@gmail.com)

Ana Pilar Beltrán, MD. UNDP, UNFPA, UNICEF, WHO, World Bank Special Program of Research, Development and Research Training in Human Reproduction, Department of Reproductive Health and Research, World Health Organization, Geneva, Switzerland. E-mail: [betrana@who.int](mailto:betrana@who.int)

Silvina Ramos, MSc. Centro de Estudios de Estado y Sociedad (CEDES), Buenos Aires, Argentina. E-mail: [silvinaramosarcoiris@gmail.com](mailto:silvinaramosarcoiris@gmail.com)

## **Abstract**

Objectives To explore obstetricians, midwives, and trainees' perceptions of CS determinants in the context of public obstetric care services provision in Argentina. Our hypothesis is that known determinants of CS use may differ in settings with limited access to essential obstetric services.

Setting We conducted a formative research study in nineteen public maternity hospitals in Argentina. An institutional survey assessed the availability of essential obstetric services. Subsequently, we conducted online surveys and semi-structured interviews to assess the opinions of providers on known CS determinants.

### Results

Obstetric services showed an adequate provision of emergency obstetric care but limited services to support women during birth. Midwives, with some exceptions, are not involved during labour. We received 680 surveys from obstetricians, residents, and midwives (response rate of 63%) and interviewed 26 key informants. Six out of ten providers (411, 61%) indicated that the use of CS is associated with *the complexities of our caseload*. Limited pain management access was deemed a potential contributing factor for CS in adolescents and first-time mothers. Providers have conflicting views on the adequacy of training to deal with complex or prolonged labour. Obstetricians with more than ten years of clinical experience indicated that fear of litigation was also associated with CS. Overall, there is consensus on the need to implement interventions to reduce unnecessary CS.

### Conclusions

Public Maternity Hospitals in Argentina have made significant improvements in the provision of emergency services. The environment of service provision does not seem to facilitate the physiological process of vaginal birth. Providers acknowledged some of those challenges.

### Funding

UNDP-UNFPA-UNICEF-WHO-Special Funding for research. University College Dublin Seed Funding.

Trial registration IS002316

## Article Summary

### Strengths and limitations of this study

- This study is one of the few studies exploring the perceptions of providers working in low-resourced settings in middle-income countries on the determinants of increasing trends of CS.
- Large sample and representation of all professionals and obstetric tasks working in low-resourced settings.
- Cluster analysis allowed to describe the response variability across professional groups in relation to specific CS determinants.
- The use of Formative Research is a valuable tool to inform the design and implementation of future interventions.
- Even though the response rate is good (63%) those who did not respond may have different views on the determinants of CS.
- Some participant hospitals had lower response rate.

### Background

In recent decades, there has been a sustained and unprecedented increase in caesarean section (CS) rates worldwide, in particular –but not exclusively– in the Latin America region.<sup>1</sup> Argentina, a middle-income country, reported rates between 27% and 52% within the public sector in 2017.<sup>2</sup> Similarly, Brazil registered national rates of 55%, with private providers close to 90%.<sup>3</sup> These regional trends cause concern and call for a scaling-up of interventions to reduce unnecessary CS.

The drivers increasing rates of CS are multiple. The most frequently cited determinants stem from financial incentives, the organisation of services, fear of litigation, and professional attitudes towards CS.<sup>4-10</sup> Along with clinical interventions, non-clinical interventions such as antenatal education, continuous emotional support during labour, audit and feedback, and the implementation of clinical guidelines have shown modest but statistically significant reductions in CS rates.<sup>11,12</sup> The World Health Organization (WHO) recommends implementing non-clinical interventions to reduce unnecessary surgical births and it encourages the incorporation of an initial formative research process to tailor interventions to local contexts, ensure implementation feasibility, and anticipate specific barriers or identify facilitators.<sup>13,14</sup>

Argentina is a federal country with a two-tier health system: a public system financed by government funds and a private system mix of social insurance and private insurance. Virtually all births occur at healthcare institutions (99.3%), and 64% of them within the public health system.<sup>2</sup> Specialists lead obstetric services in Obstetrics and Gynaecology (OB/GYN) and the role of midwives depends on how the hospital organises its services and human resources. Midwives provide antenatal care and depending on the institution, can assist or lead low-risk vaginal births.

We conducted formative research to enrich our understanding of the reasons for the sustained increase in CS use in Argentina's public sector to tailor context-specific interventions.<sup>15</sup> We applied a mixed-methods approach to explore multiple layers and perspectives from both women and health providers, as well as service delivery characteristics. Formative research has its origins in ethnographic studies and uses various data-gathering processes. The rationale behind this approach is to consider the peculiarities of the setting to better tailor suitable interventions and, at the same time, to catalyse the target population into change.<sup>16-18.</sup>

This article will focus on the perspectives of specialists in OB/GYNs, midwives and OB/GYN residents (trainees) on determinants of CS use in Argentina's public maternity hospitals.

## Methods

A comprehensive description of the methodology has been published elsewhere.<sup>15</sup> Briefly, we used a research approach that combined quantitative and qualitative data gathering techniques conducted by a multidisciplinary team.

The contextual factors of the study refer to the adequacy of services to provide emergency obstetric care, human resources availability, and women's access to comprehensive obstetric care like antenatal education, companionship during birth, and holistic pain management.

The eligibility criteria for hospitals to participate in the study were: a) public hospitals with  $\geq 1000$  annual childbirths, b) caesarean section rate higher than 27% in 2016, and c) use of the National Perinatal Information System.<sup>19,20</sup> Out of the 88 potentially eligible institutions, 24 were non-randomly selected to represent the six Argentinian regions. Nineteen agreed to participate and obtained approval from local Ethics Committees (Figure 1), and five institutions declined to participate. Finally, five Argentinian regions were included in this study: Centre, North, Northeast and Buenos Aires City.

The project was approved by the Independent Ethics Committee of Centro Rosarino de Estudios Perinatales and by the provincial Ethics Committees and/or the Teaching and Research Committees at each of the selected hospitals pursuant to the requirements in each jurisdiction. It was also approved by two Ethics Committees of WHO, the Research Project Review Panel of the UNDP/UNFPA/UNICEF/WHO/World Bank Special Programme of Research, Development and Research Training in Human Reproduction (HRP) at the Department of Sexual and Reproductive Health and Research of WHO, and the WHO Research Ethics Review Committee, Geneva, Switzerland. In Argentina, the research protocol was registered in the RENIS database (number IS002316).

The report of this research follows the Standards for Reporting Qualitative Research and Formative Research.<sup>21,22</sup>

### **Subjects and data collection**

Multiple data sources were used: an institutional survey, a health care provider online survey, and semi-structured interviews with key informants. The head of OB/GYN identified a spokesperson who led the fieldwork and introduced the project to health team members at each participating hospital.

#### *Institutional survey*

The selected champion in each hospital completed the institutional survey. The survey gathered information on the number of live births in 2017, the number and type of providers involved in maternal care, hospital CS rates, institutional infrastructures such as the number of beds, availability of services to safely manage obstetric emergencies, availability of antenatal education for women, and pain management during labour and birth.

#### *Online survey for healthcare providers*

Eligible participants for the online survey included all specialised physicians, obstetricians, and residents at Obstetrics & Gynaecology services at participating hospitals. Both permanent staff and shift personnel were included.

The health professionals' online survey included participation consent (mandatory answer) and 32 questions: 26 with pre-established options and six open-ended questions. The survey gathered the following data: role and healthcare work, including the number of deliveries/caesarean sections performed in a week; perception of determining factors for the use of caesarean section related to the institution, health professionals and pregnant women; frequency of use of monitoring cycles; improvement in quality of care; and Robson Classification knowledge, among others.<sup>23</sup>

The piloting process involved ten hospitals and asked participants to indicate if they would like to add anything. Fifteen providers suggested that inadequate pain management during labour is a contributing factor; thus, we incorporated it in the list of determinants of CS use ("*lack of pain management interventions is associated with the use of CS*").

We sent an email with the link to the survey to each eligible subject who provided an email address; the text included a brief presentation of the study with a consent form. The respondents' gender or sex was not recorded to ensure anonymity. There were three weekly reminders. Fieldwork was carried out from July 2018 to August 2019.

#### *Semi-structured interviews for key informants*

Out of the 19 hospitals participating in the study, we drew a convenience sample of five hospitals representing the different regions. In those hospitals, we conducted in-depth interviews after the on-

line survey with key informants, including the heads of departments or services, specialists in OB/GYN, midwives, and residents. The interviewers were researchers with experience in qualitative methods and in maternal health and organisational culture. The interviews were conducted either in person or by video call and recorded under informed consent.

### **Data analysis**

We described variables using standard statistical parameters. Continuous variables were presented as means and standard deviations (SDs), whereas categorical variables were presented as numbers and percentages. Human resources data was standardised to 1000 live births in 2017.

For the online survey, answers were grouped into three categories: disagreement (strongly disagree and disagree), neutral, and agreement (completely agree and agree), and were described using frequencies. The statements with modest consensus –those with  $\leq 50\%$  agreement or disagreement– were analysed using cluster analysis to examine if professional groups or any institutional variable explained the variance. Given the different types of variables assessed, a Gower's distance matrix was calculated. It was visualised using the t-Distributed Stochastic Neighbour Embedding (t-SNE, 1) and clustered with Partition around medoids (PAM) with  $k = 4$ . All statistical analyses were performed using R version 3.6.3.<sup>24–26</sup>

We transcribed the recorded in-depth interviews. Transcripts were independently coded by two researchers with experience in qualitative analysis. We undertook an in-depth framework analysis of the qualitative data focusing on determinants of CS and institutional factors.<sup>27</sup> We compared key themes emerging from the interviews with the online survey results, expanding to supplement survey findings when appropriate. Throughout the results section, we report verbatim extracts to validate and illustrate specific issues, provide further explanations, or include themes that were not addressed by the online survey.

### **Patient and public involvement**

The development of the protocol used evidence from qualitative research exploring women experience with obstetric services in public maternity hospitals. Once the study has been published, the results will be disseminated for professional, non-professional audiences in participant provinces as well as to non-governmental organizations overseeing maternal care in the Latin American region.

## **Results**

Women giving birth in the 19 participant hospitals represented 19% of the total live births in Argentina's public sector in 2017 (Figure 1).

Table 1 shows the characteristics of the 19 hospitals in 2017 as reported by the key informants in each institution. The percentage of live births by CS in the study hospitals ranged from 29% to 40% (Table 1). The hospitals had similar services; all of them had laboratory, neonatal intensive care units,

adequate access to emergency CS, and resources to manage obstetric emergencies, including safe blood transfusion services. All hospitals but one had limited access to pain management during birth, insufficient provision of antenatal education, and restricted companionship during CS. They differed on the number of healthcare providers per 1,000 live births, with a median of seven obstetricians/1000 live births and 2.8 midwives/1000 live births. Two hospitals reported a very low staffing ratio –one hospital reported 1 obstetrician/1000 live births–; and the largest number of obstetricians was 23/1000 live births in one hospital. All the professionals received a fixed monthly salary unrelated to performance.

Figure 1 Study Flowchart

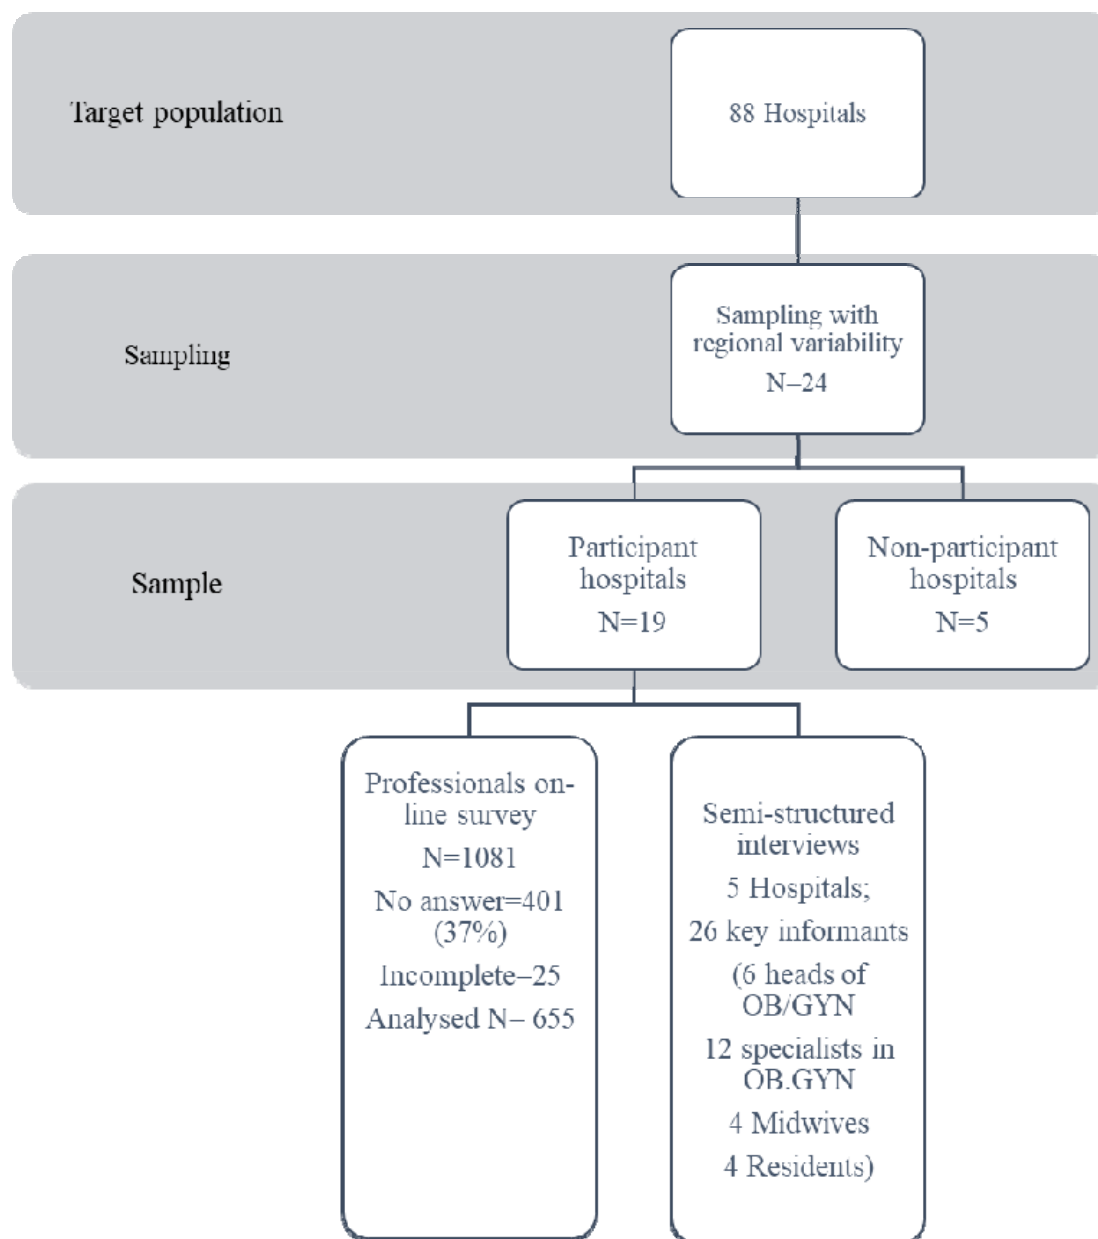



**Table 1 Characteristics of participant hospitals (N=19)**

| <b>Variables</b>                                                               | <b>Hospitals<br/>N (%) Mean (SD) Median (range)</b> |
|--------------------------------------------------------------------------------|-----------------------------------------------------|
| <i>Type of institution</i>                                                     |                                                     |
| Maternity                                                                      | 7 (37%)                                             |
| General hospital                                                               | 12 (63%)                                            |
| <i>Number of beds †</i>                                                        |                                                     |
| Obstetrics                                                                     | 44 (1-93)                                           |
| Neonatal Intensive Care Unit                                                   | 18 (1-50)                                           |
| <i>Number of delivery rooms or units of labour, delivery, and recovery†</i>    | 6 (1-16)                                            |
| <i>Number of live births</i>                                                   | 52633<br>2355 (1025-9633) †                         |
| <i>Caesarean Sections (CS)</i>                                                 |                                                     |
| Number of CS                                                                   | 21102                                               |
| CS rate†                                                                       | 37.2 (27-50)                                        |
| Protocol for vaginal delivery after CS                                         | 15 (83%)                                            |
| <i>Residency Program</i>                                                       |                                                     |
| OB/GYNs                                                                        | 18 (90%)                                            |
| Midwives                                                                       | 7 (36%)                                             |
| <i>Number of professionals†</i>                                                |                                                     |
| OB/GYNs                                                                        | 20 (2-67)                                           |
| Residents†                                                                     | 13 (0-31)                                           |
| Midwives†                                                                      | 12 (0-30)                                           |
| <i>Number of professionals/ 1000 live births†</i>                              |                                                     |
| OB/GYNs                                                                        | 7 (1-23)                                            |
| Residents                                                                      | 5.8 (0-15)                                          |
| Midwives                                                                       | 2.8 (0-18)                                          |
| <i>Midwives' availability (24/7)</i>                                           | 13 (68%)                                            |
| <i>Midwives participating in low-risk births</i>                               | 9 (45%)                                             |
| <i>Pain management interventions</i>                                           |                                                     |
| Access to non-opioids                                                          | 10 (52%)                                            |
| Access to epidural (24/7)                                                      | 9 (47.4%)                                           |
| Access to opioids                                                              | 12 (63%)                                            |
| Relaxation techniques                                                          | 4 (21.1%)                                           |
| Access to hot shower                                                           | 9 (47.4%)                                           |
| Access to massages                                                             | 3 (15.2%)                                           |
| <i>Access to companionship (24/7)</i>                                          |                                                     |
| During labour                                                                  | 14 (73%)                                            |
| During delivery                                                                | 16 (84%)                                            |
| During CS                                                                      | 2 (10%)                                             |
| Availability of prenatal education (morning, afternoon, Monday through Friday) | 1 (5.5%)                                            |

\*Data is shown as N (%) unless otherwise indicated.

†median (range)

OB/GYN: Specialist in Obstetrics and Gynaecology

We received 680 online surveys (response rate of 63%; range 19%-84%). We excluded 25 due to missing data related to professional background, which resulted in 655 completed surveys to analyse (Figure 1).

The completed surveys were from OB/GYN specialists (N=327), midwives (N=161) and residents (N=167). Cluster analysis allowed us to identify four groups based on tasks and years of experience,

and profession. Group 1 (N=247) included OB/GYNs, who worked for a mean of 11 years and attended 2-10 birth per week (any type). Group 2 had more experienced OB/GYNs (N=80) and midwives (N=23) (mean 22 years of professional experience) involved either in antenatal care, teaching, or management duties. Group 3 consisted of residents (N=167) with three years of experience participating in more than ten deliveries per week. Group 4 included midwives (N=138) with a mean professional practice of 12.5 years in assisting vaginal deliveries (Table 2). We conducted 26 semi-structured interviews in total with six heads of OB/GYN departments, 12 specialists in OB/GYN, four midwives and four residents.

**Table 2 Online survey clusters according to clinical experience (years) and main duties**

|                                             | Median years of professional experience | Main duties                                                        | N=655 |
|---------------------------------------------|-----------------------------------------|--------------------------------------------------------------------|-------|
| <b>Group 1<br/>OB/GYNs</b>                  | 11                                      | Assistance of all delivery modes. 2-10 deliveries per week         | 247   |
| <b>Group 2<br/>OB/GYNs and<br/>midwives</b> | 22                                      | Antenatal care, research, supervisory tasks, education             | 103   |
| <b>Group 3<br/>Residents</b>                | 3.5                                     | Assistance of all delivery modes. More than 10 deliveries per week | 167   |
| <b>Group 4<br/>Midwives</b>                 | 12.5                                    | Assistance of all deliveries 2- 10 deliveries per week             | 138   |

OB/GYN: Specialist in Obstetrics and Gynaecology

Six out of ten participants (411, 61%) agreed that the use of CS is associated with "*the complexities of our caseload*" (Table 3). Additionally, key informants point out diagnostic innovations and comorbidities as determinants of CS use.

*"Nowadays, we have more diagnostic procedures during pregnancy [...] Maybe, in the past, women had a vaginal birth with worse clinical outcomes [...] yes, the number of CS has increased, but the neonatal outcomes have improved"* (Hospital 2, OB/GYN).

*"The main factor for CS is clinical. We see more women with severe comorbidities. Also, if they have had a previous CS and comorbidity, the delivery is a CS [...]."* (Hospital 3, OB/GYN).

Shortage of skilled professionals was considered a determinant of the overuse of CS by 12.8% of the sample while 16% agreed that insufficient training for complicated births was a determinant.

A similar level of agreement appeared regarding inadequate skills to conduct vaginal birth after CS (VBAC) (N=84, 12.4 %) (Table 3). However, when asked if CS is associated with residents' lack of training in performing complex deliveries, the professional groups differed in their answers: 30% of midwives agreed that there is an association (N=39, 30%) while only 5% of residents agreed (Table 4).

The semi-structured interviews allowed us to explore further whether the number, skills, and experience of obstetricians, midwives, and residents influence the use of CS. Among the interviewees, there was consensus that professionals are well trained; however, midwives perceived themselves as

less prone to intervene and considered that the medical professionals were trained with a more interventionist mindset.

*"We have to fight every day as doctors tend to intervene. Now we have a training program on foetal medicine, and most doctors perform a foetal ultrasound. I notice more and more the tendency to intervene"* (Hospital 1, midwife).

The semi-structured interviews also revealed challenges in training future generations of obstetricians to perform instrumental deliveries when needed.

*"Instrumental deliveries are tough, and no one wants to do them. Before, it was a common practice; now, people are cautious. In the collective imagination of society, the forceps can kill or harm the baby. Even judges, lawyers have that idea... [And the training to conduct instrumental deliveries?] ... little as we don't do them"* (Hospital 4, OB/GYN).

*"A resident can complete their training -if lucky- performing five forceps. Maybe a handful of obstetricians at the ward have the skills to use forceps. Doctors prefer a CS as it can quickly solve the clinical problem"* (Hospital 2, Resident).

In most hospitals, key informants did not support the idea that scarcity of human resources is relevant to the increase of CS. However, in two hospitals with either no midwives on their teams or a very low staff-to-live-birth ratio, clinicians did recognise it as a contributing factor. In the latter two hospitals, busy shifts with only one doctor on-call were described. In those circumstances, if a woman presented with failing-to-progress labour, the decision may switch to a surgical delivery (verbatim not shown).

Questions related to women's preferences and first-time mothers' anxiety due to lack of preparation for birth had the highest number of neutral responses. We found variability between professional groups. 17% of midwives agreed with the statement *"women demand a CS"* compared to 30% of obstetricians and 28% of residents. For the statement *"the use of CS in first-time mothers is related to anxiety"*, 38% of the obstetricians, 34.4% of residents and 29% of midwives agreed it could be considered a determinant of CS use (Table 4).

Key informants discussed both matters:

*"We have requests both ways. Patients that want vaginal birth at all cost and patients that want CS. We work under significant pressure. Patients have changed..."* (Hospital 4, OB/GYN).

Lack of adequate access to pain management interventions as a reason for CS did not reach consensus in the on-line survey; 31% agreed, 44% disagreed, and 12.7% had a neutral opinion, with statistically insignificant variation between responses (Table 3). Key informants helped to understand the role of limited access to epidurals and other pain management strategies like hot water, relaxation, or massage.

There was some consensus that the absence of these options might influence women's requests for a CS, especially in adolescent mothers.

*"If a patient is in pain, I won't specifically say 'OK, this patient needs a CS because of the pain'. It does not affect our decision [doctors], but it does affect the patient's [...] The vast majority of patients ask for a CS because of the pain"* (Hospital 4, OB/GYN).

When asked if the lack of epidural analgesia is a determinant of CS use, a midwife in a hospital with no access to an epidural and a high proportion of adolescents eloquently stated:

*"Totally. I agree. We do not have a population of women aged 30 or more. They are empowered, and they can say: 'Yes, I would prefer a vaginal birth even though it means I will have pain during birth'. [Our population] are younger girls, and to be honest, a fifteen-year-old girl... it is tough to accept labour pain. We do not have access to an epidural for them to at least try a vaginal birth. In those cases, yes, we would recommend a CS"* (Hospital 3, Midwife).

Others disagree: *"I don't think pain is per se a limitation during birth. We do have some strategies for pain management, especially midwives do. They know how to apply and use them. Thankfully, women can choose their companion during birth, and that is a big relief"* (Hospital 2, OB/GYN).

In a hospital with access to an epidural, the key informants did not see birth pain as a CS determinant: *"We did not notice that pain [affects decision-making]. We do try to use epidurals, especially with younger girls [...] But, no, not at all, I don't think pain influences CS"* (Hospital 1, Midwife).

Fear of litigation was relevant for the two professional groups with more experience— OB/GYN and midwives performing more than ten deliveries per week, Group 1 (N=151, 73%) and Group 2 (N=67, 65%) OB/GYNs and midwives currently in teaching, management, or research tasks (results not shown) while 40% and 37% of overall online survey responses disagreed and agreed, respectively (table 3).

*"Unfortunately, as obstetricians, we are the most litigated specialists in the country. It's complex"* (Hospital 2, OB/GYN).

*"We have learnt that we are alone. Professional liability insurance does not cover us [in the case of litigation]. We must respond with our savings. Maybe with all your assets. We have learned that the lawyers defend the hospital in public hospitals, but not us, the professionals working in the hospital. You would think that they would defend the doctors, but they don't [...]"* (Hospital 1, Specialist).

There was consensus among all professional groups that the use of CS in public maternity hospitals is unrelated to financial incentives for the institution (N=621, 92%), the perception that CS is safer than vaginal birth (N=549, 81%), or unsupportive infrastructure (N=419, 74%) (Table 3).

Most of the participants did not recognise any formal communication of CS rates by their institutions. About half of the participants (N=380, 56.2%) expressed having regular meetings to audit clinical indications of CS. A quarter indicated that audit activities were in response to an unexpected adverse event rather than routine (N=161, 23%). Finally, six out of ten healthcare professionals agreed that there was a need to optimise CS use and half indicated they were familiar with the Robson Classification (data not shown).

**Table 3 Online survey answers according to levels of agreement (N=655)**

|                                                                | <b>Disagree or strongly disagree<br/>N (%)</b>                                                      | <b>Agree or strongly agree*<br/>N (%)</b> | <b>Neutral<br/>N (%)</b> |            |
|----------------------------------------------------------------|-----------------------------------------------------------------------------------------------------|-------------------------------------------|--------------------------|------------|
| <b>Statements with higher % of high and moderate agreement</b> | In my institution, the use of CS is associated with...                                              |                                           |                          |            |
|                                                                | the complexity of our case load                                                                     | 138 (20.4)                                | 411(60.8)                | 112 (16.5) |
|                                                                | financial incentives                                                                                | 621 (91.8)                                | 14(2)                    | 24 (3.5)   |
|                                                                | CS being safer than a VB                                                                            | 549 (81.22)                               | 40 (5.9)                 | 71 (10.5)  |
|                                                                | Shortage of human resources                                                                         | 522 (77.2)                                | 86(12.7)                 | 54 (7.9)   |
|                                                                | deficits in infrastructure                                                                          | 419 (73.8)                                | 89(13.1)                 | 71 (10.5)  |
|                                                                | inadequate number of trained healthcare professionals with the skills to perform complex deliveries | 464 (68.6)                                | 87(12.8)                 | 98 (14.5)  |
|                                                                | deficit in training to conduct VB after a CS                                                        | 467 (69.0)                                | 84 (12.4)                | 106 (15.6) |
| <b>Statements with higher % of neutral</b>                     | lack of access to pain management strategies during VB**                                            | 163 (44)                                  | 116 (31)                 | 85(12.7)   |
|                                                                | deficits in the training of residents to monitor and perform complex deliveries                     | 418 (61.8)                                | 104(15.3)                | 138 (20)   |
|                                                                | fear of litigation                                                                                  | 239 (39.1)                                | 225(36.8)                | 147 (24)   |
|                                                                | first time mothers and their anxiety and poor preparation for VB                                    | 246 (37.4)                                | 221(33.7)                | 188 (28)   |
|                                                                | women's preferences                                                                                 | 290 (44.2)                                | 172(26.4)                | 193 (29.3) |

\*High and moderate agreement: more than 60% agree or disagree

\*\* This statement was incorporated in the second round of surveys.

VB: vaginal birth; CS: caesarean section

**Table 4 Online survey responses with the lowest level of agreement in clusters grouped by profession, years of experience, and clinical tasks (1)**

|                                                                                                                                                            | <b>Cluster 1<br/>Group 1<br/>OB/GYN<br/>Specialists<br/>11 years of<br/>experience<br/>N= 247</b> | <b>Group 2<br/>OB/GYNs and<br/>midwives<br/>22 years of<br/>experience<br/>antenatal care,<br/>research, and<br/>supervisory tasks<br/>N=103</b> | <b>Group 3<br/>Residents<br/>N=167</b> | <b>Group 4<br/>Midwives<br/>N=138</b> |
|------------------------------------------------------------------------------------------------------------------------------------------------------------|---------------------------------------------------------------------------------------------------|--------------------------------------------------------------------------------------------------------------------------------------------------|----------------------------------------|---------------------------------------|
| <b>"I agree or completely agree that the use of CS is associated with deficits in the training of residents to monitor and perform complex deliveries"</b> | 40 (16)                                                                                           | 18(17)                                                                                                                                           | 8 (5)                                  | 39 (30)                               |

|                                                                                                                                                   |         |         |           |         |
|---------------------------------------------------------------------------------------------------------------------------------------------------|---------|---------|-----------|---------|
| “I agree or completely agree that the use of CS in first time mothers is related to their anxiety as they don’t know birth can be a long process” | 94(38)  | 30 (28) | 57(34)    | 40(29)  |
| “I agree or completely agree that the use of CS is associated with women’s preferences”                                                           | 74 (30) | 26 (27) | 48 (28-6) | 24 (17) |

(1) Cluster analysis Gower distance matrix partition around medoids (PAM)  
 CS: caesarean section; OB/GYN: Specialist in Obstetrics and Gynaecology

## Discussion

This formative research study characterises public maternity hospitals' work environment in Argentina, emphasising the availability of essential obstetric services and human resources. It provides an improved understanding of healthcare providers' perceptions of determinants of CS in the public health system and a framework for anticipating which non-clinical interventions are feasible and valid considering the factors mentioned above.

Our research suggests that services are organized to provide adequate responses to obstetric emergencies. However, they informed deficits in the availability of strategies for pain management such as epidural, hot showers or relaxation techniques, and limited antenatal education. Some hospitals had insufficient human resources and space limitations impeding constant support during birth.

All the professional groups agreed that CS is related to complex-case mix or clinical indications. This finding is in line with international studies. Panda et al. summarised in a systematic review of 34 studies published in English the clinicians' views of factors influencing decision-making, and clinical indication appeared significant in eighteen studies.<sup>8</sup> Our online survey did not explore what providers understood as a clinical indication, but the semi-structured interviews further confirmed clinicians' views that increased comorbidities and new technologies contribute to the increased use of CS. These findings suggest that overall, healthcare teams perceived clinical indications as the main driver for performing a CS though about a third identified other contextual factors as determinants of CS use like services organisation, service provision, limited human resources, midwives' role in the group, women's preferences, adequate number of professionals to support women during labour, or deficits in antenatal education for both pregnant women and companions.

From the healthcare teams' perspective, the implementation of interventions targeted at clinicians, like audit and feedback, clinical guidelines, and the introduction of a second opinion may help to improve their clinical decision-making.<sup>12-14</sup> Still, this study showed the importance of assessing contextual factors such as services provision and human resources. If clinicians have limited options for pain

management or no human resources to provide continuous labour support –in some institutions without midwives–, the interventions focusing on clinical guidelines or audit and feedback alone may not lead to a desirable result.

Residents' skills emerged as a controversial theme in our study. Most residents perceived that their training to perform difficult vaginal births is not related to the increased use of CS, but more than half of midwives disagreed. As reported in many other countries, our data suggest that the use of instrumental deliveries is in decline, with consequently reduced possibilities for training new obstetricians.<sup>28</sup> How to better equip trainees for instrumental birth requires further research.<sup>29</sup>

We find differences in health providers' views of the role of women's preferences for CS. Midwives actively involved in antenatal care or assisting deliveries disagreed with the view that women's preferences are linked to CS use, which is also in line with previous research worldwide.<sup>7–30</sup> However, in half of the participating hospitals, midwives are not present to assist during birth. The power imbalance between medics and midwives is well documented. It can be addressed by changes in human resource organisation or by providing midwives with an active role on the team.<sup>31,32</sup> Our study did not explore power imbalance, but it showed that obstetricians lead labour in most hospitals, which results in a very limited role for midwives during birth, even in low-risk pregnancies. Once again, our study showed that the small number of midwives in most of the hospitals is insufficient to guarantee continuous professional support during birth for women. Considering the limited exposure to antenatal education in addition to this, the result is an environment which does not seem to facilitate the physiological process of vaginal birth.

The interviews with key informants acknowledged restrictive access to pain relief and its impact on the birth experience, particularly in adolescents. The management of pain during birth is an essential component of obstetric services and needs to be organised, resourced, and monitored. This is particularly true in Argentina, which has a 13% overall adolescent pregnancy rate and provinces with rates above 20%.<sup>2</sup> As well, a recurring topic that appeared when conducting semi-structured interviews was the need to improve antenatal education, which has already been identified as a non-clinical intervention with a positive impact on birth experience and vaginal birth rates.<sup>33</sup>

In terms of insufficient infrastructure or trained human resources, we mistakenly assumed that providers would acknowledge these factors as contributing to the overuse of CS. However, only providers in hospitals with severe shortage of human resources recognised the influence on clinical decision making.

The extent to which fear of litigation impacted obstetricians with more clinical experience requires all stakeholders to find possible solutions. There are extensive references to lawsuits against obstetricians in the literature and evidence.<sup>8,9 34–36</sup> We look at this potential determinant of CS as a burning issue in public maternity hospitals in Argentina. The fear of litigation was deeply rooted amongst experienced obstetricians in public hospitals as they feel they work in an environment with minimum support. The

road to sort out litigation in healthcare is complex compared to the experience of high-income countries but needs to be addressed if CS use is to be reduced in a sustainable manner.<sup>37</sup> The disagreement regarding the association between financial incentives and surgical deliveries is not surprising. This association is relevant for physicians paid in a fee-for-practice model.<sup>7 38-40</sup> In the public sector of Argentina, health care providers receive a fixed monthly salary regardless of the workload or the procedures they perform, and hospitals do not usually receive extra funding for a surgical delivery.

### *Strengths and limitations*

To our knowledge, our study is the first to explore the perceptions of providers working in public hospitals in Argentina on the determinants of increasing trends of CS and future interventions to optimize its use. We showed that the use of formative research is a valuable tool to inform the design and implementation of future interventions. We had a large sample and representation of all professionals and obstetric tasks, which permitted us to identify differences across professional cadres. This variability allows for tailoring implementations specifically to each cadre, which will also benefit the implementation process. Participants' response rate was high considering the usual response rates from providers. However, professionals who did not complete the survey may not engage with the implementation process and therefore result in an additional barrier.

Another limitation is that opinions do not necessarily reflect current behaviour. Nevertheless, perceptions are an essential component of how health teams frame their environment and give sense to their clinical decisions.

## **Conclusions**

There is a consensus among obstetricians, midwives, and residents on the need to implement interventions to decrease unnecessary surgical deliveries in Argentina.

We highlight an essential finding: obstetric services need to incorporate a holistic approach to pain management during vaginal birth and ensure continuous support during delivery from staff or carers to optimise CS use, especially in adolescents and first-time mothers.

At the same time, providers agreed that clinical indication is the main factor driving CS use and, therefore, interventions supporting the decision-making process can be of benefit.

Fear of litigation emerged as a critical issue highlighted by more experienced obstetricians. Therefore, strategies to protect health providers adhering to obstetric evidence-based guidelines against any legal matter within the public health system are warranted.

## **Author's contributions**

All authors participated in developing this project protocol. SR was responsible for the scientific aspects of the project, coordinating the team, protocol development, as well as for writing and reviewing the final version of the original protocol. APB was responsible for the revision of the



protocol and for technical assistance regarding the design and methodology. She also obtained the funding for the project. MR, CP and YS were responsible for assisting the writing of the protocol and developing the versions of the instruments. NR and CG contributed to the development of the instruments and coordinated field work. CP, MR and YS contributed to the writing of the article and reviewed the final version. All authors provided feedback and revised the manuscript. The following authors were responsible for specific components of the project: SR wrote the first version of the study protocol and, together with MR, CP, and YS, coordinated its development and approved the final version. CP contributed to the design of the methodology and analysis of the project. MR contributed to the methodology, the design of the fieldwork. YS contributed to literature revision. YS, CS, CG and NR conducted the semi-structured interviews. CS and MR conducted the semi-structured interviews analysis. All authors read and approved the final manuscript.

### **Declaration of interest**

The authors declare that there are no conflicts of interest.

### **Data sharing**

The data is stored on CEDES' server, encrypted. CEDES is the guardian of the dataset. Data is anonymised. Our data collection forms did not include any variable that could reveal the identity of the participants. The datasets generated and/or analysed during the current study are available from the corresponding author on reasonable demand.

### **Acknowledgements**

#### *Source of funding*

This research was funded by the UNDP-UNFPA-UNICEF-WHO-World Bank Special Programme of Research, Development and Research Training in Human Reproduction (HRP), a cosponsored programme executed by the World Health Organization (WHO) in the Department of Sexual and Reproductive Health and Research (SRH). Grant Number A65919

Dr Carla Perrotta also received funds to complete this research from the University College Dublin (UCD), College of Health Sciences, SEED Fund (2019) Grant number SF1735.

Natalia Righetti is a research fellow funded by the Ministry of Health, Buenos Aires City Government.

The study design; the collection, analysis, and interpretation of the data; the writing of the report and the decision to submit the paper for publication are solely the responsibility of the authors and do not reflect the views of the referred program or the other funding institutions. All authors had full access to all the data and accept responsibility to submit for publication.

#### *Acknowledgements*

Dr Marcelo Soria, Associate Professor, University of Buenos Aires provided valuable statistical advice.

Mercedes Vila Ortiz edited the manuscript.

## References

1. Betrán AP, Ye J, Moller A-B, Zhang J, Gülmezoglu AM, Torloni MR. The Increasing Trend in Caesarean Section Rates: Global, Regional and National Estimates: 1990-2014. Zeeb H, editor. PLOS ONE. 2016 Feb 5;11(2):e M0148343.
2. Ministerio de Salud de la Nación Argentina. Deis | Dirección de Estadísticas e Información de Salud [Internet]. [accesed 2021 Jan 1]. Available from: <http://www.deis.msal.gov.ar/>
3. Rudey EL, Leal M do C, Rego G. Cesarean section rates in Brazil: Trend analysis using the Robson classification system. *Medicine (Baltimore)*. 2020 Apr;99(17):e19880.
4. Carlson NS, Corwin EJ, Hernandez TL, Holt E, Lowe NK, Hurt KJ. Association between provider type and cesarean birth in healthy nulliparous laboring women: A retrospective cohort study. *Birth Berkeley Calif*. 2018 Jun;45(2):159–68.
5. Huang K, Tao F, Faragher B, Raven J, Tolhurst R, Tang S, et al. A mixed-method study of factors associated with differences in caesarean section rates at community level: The case of rural China. *Midwifery*. 2013 Aug;29(8):911–20.
6. Hoxha I, Syrogiannouli L, Braha M, Goodman DC, Da Costa BR, Jüni P. Cesarean sections and private insurance: Systematic review and meta-analysis. Vol. 7, *BMJ Open*. BMJ Publishing Group; 2017. Available from: <https://pubmed-ncbi-nlm-nih-gov.ucd.idm.oclc.org/28827257/>
7. Long Q, Kingdon C, Yang F, Renecke MD, Jahanfar S, Bohren MA, et al. Prevalence of and reasons for women's, family members', and health professionals' preferences for cesarean section in China: A mixed-methods systematic review. *PLoS Med*. 2018 Oct 1;15(10).
8. Panda S, Begley C, Daly D. Clinicians' views of factors influencing decision-making for caesarean section: A systematic review and metasynthesis of qualitative, quantitative and mixed methods studies. *PLoS ONE*. 2018 Jul 1;13(7):e0200941.
9. Panda S, Daly D, Begley C, Karlström A, Larsson B, Bäck L, et al. Factors influencing decision-making for caesarean section in Sweden - A qualitative study. *BMC Pregnancy Childbirth*. 2018 Sep 17;18(1).
10. Freitas PF, Fernandes TMB. Association between institutional factors, birth care profile, and cesarean section rates in Santa Catarina. *Rev Bras Epidemiol Braz J Epidemiol*. 2016 Sep;19(3):525–38.
11. Hodnett ED, Gates S, Hofmeyr GJ, Sakala C. Continuous support for women during childbirth. *Cochrane Database Syst Rev*. 2013 Jul 15;7:CD003766.
12. Chen I, Opiyo N, Tavender E, Mortazhejri S, Rader T, Petkovic J, et al. Non-clinical interventions for reducing unnecessary caesarean section. Vol. 2018, *Cochrane Database of Systematic Reviews*. John Wiley and Sons Ltd; 2018. p. CD005528.
13. Betran AP, Torloni MR, Zhang JJ, Gülmezoglu AM, WHO Working Group on Caesarean Section. WHO Statement on Caesarean Section Rates. *BJOG Int J Obstet Gynaecol*. 2016 Apr;123(5):667–70.

14. Opiyo N, Kingdon C, Oladapo OT, Souza JP, Vogel JP, Bonet M, et al. Non-clinical interventions to reduce unnecessary caesarean sections: WHO recommendations. *Bull World Health Organ.* 2020 Jan 1;98(1):66–8.
15. Ramos S, Romero M, Perrotta C, Sguassero Y, Straw C, Gialdini C, et al. Optimizing the use of cesarean section in Argentina: design and methodology of a formative research for the development of interventions. *Reprod Health.* 2021 Dec 26;18(1):23.
16. Leirbakk MJ, Torper J, Engebretsen E, Opsahl JN, Zeanah P, Magnus JH. Formative research in the development of a salutogenic early intervention home visiting program integrated in public child health service in a multiethnic population in Norway 11 Medical and Health Sciences 1117 Public Health and Health Services. *BMC Health Serv Res.* 2018 Sep 27;18(1).
17. Zimmerman M, Steckel L. Formative research: pretesting, revising, and more pretesting. *Dev Commun Rep.* 1985;(51):9, 12.
18. Vastine A, Gittelsohn J, Ethelbah B, Anliker J, Caballero B. Formative research and stakeholder participation in intervention development. *Am J Health Behav.* 2005;29(1):57–69.
19. Karolinski A, Mercer R, Salgado P, Ocampo C, Bolzán A, Nieto R, et al. Primer informe nacional de relevamiento epidemiológico SIP-Gestión: desarrollo e implementación a escala nacional de un sistema de información en salud de la mujer y perinatal en Argentina. OPS; 2013.
20. Karolinski A, Mercer R, Bolzán A, Salgado P, Ocampo C, Nieto R, et al. Foundations for the development and implementation of a women’s and perinatal health information model for management in Latin America. *Rev Panam Salud PublicaPan Am J Public Health.* 2018;42.
21. Hollin IL, Craig BM, Coast J, Beusterien K, Vass C, DiSantostefano R, et al. Reporting Formative Qualitative Research to Support the Development of Quantitative Preference Study Protocols and Corresponding Survey Instruments: Guidelines for Authors and Reviewers. *The Patient.* 2020 Feb;13(1):121–36.
22. O’Brien BC, Harris IB, Beckman TJ, Reed DA, Cook DA. Standards for Reporting Qualitative Research. *Acad Med.* 2014 Sep;89(9):1245–51.
23. Robson M, Hartigan L, Murphy M. Methods of achieving and maintaining an appropriate caesarean section rate. *Best Pract Res Clin Obstet Gynaecol.* 2013 Apr;27(2):297–308.
24. Van Der Maaten L, Hinton G. Visualizing Data using t-SNE. Vol. 9, *Journal of Machine Learning Research.* 2008.
25. Reynolds AP, Richards G, De La Iglesia B, Rayward-Smith VJ. Clustering rules: A comparison of partitioning and hierarchical clustering algorithms. *J Math Model Algorithms.* 2006 Dec 3;5(4):475–504.
26. R Core Team (2019). — European Environment Agency [Internet]. [cited 2020 Jul 3]. Available from: <https://www.eea.europa.eu/data-and-maps/indicators/oxygen-consuming-substances-in-rivers/r-development-core-team-2006>
27. Gale NK, Heath G, Cameron E, Rashid S, Redwood S. Using the framework method for the analysis of qualitative data in multi-disciplinary health research. *BMC Med Res Methodol.* 2013 Dec 18;13(1):117.

28. Kyser KL, Lu X, Santillan D, Santillan M, Caughey AB, Wilson MC, et al. Forceps Delivery Volumes in Teaching and Nonteaching Hospitals: Are Volumes Sufficient for Physicians to Acquire and Maintain Competence? *Acad Med J Assoc Am Med Coll.* 2014 Jan;89(1):71–6.
29. Rose K, Kwan L, Pluym ID, Zhang H, Han CS, Afshar Y. Forceps-assisted vaginal delivery: the landscape of obstetrics and gynecology resident training. *J Matern-Fetal Neonatal Med Off J Eur Assoc Perinat Med Fed Asia Ocean Perinat Soc Int Soc Perinat Obstet.* 2019 Oct 21;1–7.
30. Loke AY, Davies L, Mak YW. Is it the decision of women to choose a cesarean section as the mode of birth? A review of literature on the views of stakeholders. *BMC Pregnancy Childbirth.* 2019 Aug;19(1).
31. Kingdon C, Downe S, Betran AP. Interventions targeted at health professionals to reduce unnecessary caesarean sections: a qualitative evidence synthesis. *BMJ Open.* 2018 Dec 16;8(12):e025073.
32. Kingdon C, Downe S, Betran AP. Non-clinical interventions to reduce unnecessary caesarean section targeted at organisations, facilities and systems: Systematic review of qualitative studies. 2018; Available from: <https://doi.org/10.1371/journal.pone.0203274>
33. Kingdon C, Downe S, Betran AP. Women’s and communities’ views of targeted educational interventions to reduce unnecessary caesarean section: A qualitative evidence synthesis. Vol. 15, *Reproductive Health.* BioMed Central Ltd.; 2018. Available from: <https://pubmed.ncbi.nlm.nih.gov/30041661/>
34. Johanson R, Newburn M, Macfarlane A. Has the medicalisation of childbirth gone too far? Vol. 324, *British Medical Journal.* BMJ Publishing Group; 2002. p. 892–5.
35. Carroll AE, Buddenbaum JL. High and low-risk specialties experience with the U.S. medical malpractice system. *BMC Health Serv Res.* 2013;13(1):465.
36. Durrance CP, Hankins S. Medical Malpractice Liability Exposure and OB/GYN Physician Delivery Decisions. *Health Serv Res.* 2018 Aug 1;53(4):2633–50.
37. Cardoso R, Zarin W, Nincic V, Barber SL, Gulmezoglu AM, Wilson C, et al. Evaluative reports on medical malpractice policies in obstetrics: a rapid scoping review. *Syst Rev.* 2017 Dec 6;6(1):181.
38. Bogg L, Huang K, Long Q, Shen Y, Hemminki E. Dramatic increase of Cesarean deliveries in the midst of health reforms in rural China. *Soc Sci Med.* 2010 May;70(10):1544–9.
39. Tadevosyan M, Ghazaryan A, Harutyunyan A, Petrosyan V, Atherly A, Hekimian K. Factors contributing to rapidly increasing rates of cesarean section in Armenia: A partially mixed concurrent quantitative-qualitative equal status study. *BMC Pregnancy Childbirth.* 2019 Jan 3;19(1):2.
40. Melman S, Schreurs RHP, Dirksen CD, Kwee A, Nijhuis JG, Smeets NAC, et al. Identification of barriers and facilitators for optimal cesarean section care: perspective of professionals. *BMC Pregnancy Childbirth.* 2017 Dec 14;17(1):230.

Target population

68 Hospitals

Sampling

Sampling with regional variability  
N=24

Sample

Participant hospitals  
N=19

Non-participant hospitals  
N=5

Professionals online survey  
N=1081  
No answer=401 (37%)  
Incomplete=25  
Analysed N= 655

Semi-structured interviews  
5 Hospitals;  
26 key informants  
(6 heads of OBGYN  
12 specialists in OBGYN  
4 Midwives  
4 Residents)
